# Supplementary material for: Eprinomectin and Moxidectin Resistance of Trichostrongyloids on a Goat Farm in Austria
Source: MDPI journal article supplement (doi:10.3390/pathogens11050498), 2022-04-21
Supplement: s1 [file s1]

**Table S1.** Data on animals (m= male; f= female; Shz= Steirische Scheckenziege (Styrian piebald goat; a local mountain goat breed); Va= Valais black necked goat; EPN= eprinomectin; MOX= moxidectin; EpG= eggs per gram of faeces; bt= before treatment; pt= post treatment; - = no data).

| Goat nr. | Age (years)* | Sex | Breed | EPN    |        | MOX    |        |
|----------|--------------|-----|-------|--------|--------|--------|--------|
|          |              |     |       | EpG bt | Epg pt | EpG bt | Epg pt |
| 1        | 5            | m   | Shz   | 1660   | 1910   | -      | -      |
| 2        | 6            | f   | Shz   | 0      | -      | 450    | 35     |
| 3        | 4            | f   | Shz   | 0      | -      | 2930   | 785    |
| 4        | 4            | f   | Shz   | 360    | 180    | 1410   | 140    |
| 5        | 4            | f   | Shz   | 0      | -      | 1465   | 285    |
| 6        | 2            | f   | Shz   | 5      | -      | 1520   | 125    |
| 7        | 2            | f   | Shz   | 1255   | 585    | 885    | 60     |
| 8        | 2            | f   | Shz   | 905    | 240    | 2165   | 15     |
| 10       | 0.5          | f   | Shz   | 565    | 455    | 1360   | 1155   |
| 11       | 1            | f   | Shz   | 475    | 1020   | -      | -      |
| 12       | 0.5          | m   | Shz   | 25     | -      | -      | -      |
| 13       | 3            | f   | Shz   | 105    | 135    | 1555   | 70     |
| 14       | 3            | f   | Shz   | 0      | -      | 1310   | 90     |
| 15       | 2            | f   | Shz   | 0      | -      | 2375   | 5      |
| 16       | 3            | f   | Shz   | 45     | -      | -      | -      |
| 17       | 2            | f   | Shz   | 10     | -      | -      | -      |
| 18       | 2            | f   | Shz   | 1045   | 640    | 880    | 375    |
| 20       | 0.5          | f   | Shz   | 485    | 20     | -      | -      |
| 21       | 0.5          | f   | Shz   | 1230   | 445    | -      | -      |
| 22       | 0.5          | f   | Shz   | 765    | 30     | -      | -      |
| 19       | 0.5          | f   | Va    | 1540   | 315    | 2625   | 650    |
| 23       | 0.5          | f   | Va    | 740    | 325    | 2240   | 1270   |
| 24       | 10           | f   | Va    | 1140   | 1170   | 4430   | 105    |
| 25       | 6            | m   | Va    | 2125   | 4280   | 3950   | 1465   |
| 26       | 0.5          | f   | Va    | 1910   | 920    | -      | -      |
| 27       | 8            | f   | Va    | 0      | -      | 4025   | 65     |
| 28       | 8            | f   | Va    | 1690   | 415    | -      | -      |
| 29       | 8            | f   | Va    | 0      | -      | -      | -      |
